# Supplementary material for: Cytosolic ME1 integrated with mitochondrial IDH2 supports tumor growth and metastasis
Source: PubMed Central journal article supplement — Redox Biol. 2020 Aug 13;36:101685. doi: 10.1016/j.redox.2020.101685 (PMC7452056; doi:10.1016/j.redox.2020.101685), 2020-08-13
Supplement: mmc1.pdf [file mmc1.pdf]

1  
2  
3  
4  
5  
6  
7  
8  
9  
10  
11  
12  
13  
14  
15  
16  
17  
18  
19  
20  
21

## SUPPLEMENTARY INFORMATION

### **Cytosolic ME1 integrated with mitochondrial IDH2 supports tumor growth and metastasis**

Chang Shao<sup>1,2,3</sup>, Wenjie Lu<sup>2</sup>, Ye Du<sup>4</sup>, Wenchao Yan<sup>2</sup>, Qiuyu Bao<sup>2</sup>, Yang Tian<sup>2</sup>,  
Guangji Wang<sup>1,3</sup>, Hui Ye<sup>1,\*</sup>, Haiping Hao<sup>1,2,3\*</sup>

<sup>1</sup> Key Laboratory of Drug Metabolism and Pharmacokinetics, State Key Laboratory of Natural Medicines, <sup>2</sup> School of Pharmacy, China Pharmaceutical University, Nanjing 210009, Jiangsu, China. <sup>3</sup> Pharmacy department, Shenzhen Luohu People's Hospital, Youyi Road No. 47, Shenzhen 518000, China. <sup>4</sup> Department of Breast Surgery, The First Hospital of Jilin University, Changchun 130021, Jilin, China.

\* Correspondence: [cpuyehui@cpu.edu.cn](mailto:cpuyehui@cpu.edu.cn) (H.Y.), Tel:86-25-83271128,  
[haipinghao@cpu.edu.cn](mailto:haipinghao@cpu.edu.cn) (H.H.), Tel: 86-25-83271179.

22 **Inventory of Supplementary information**

23 **SUPPLEMENTARY FIGURES:**

24 **Supplementary Figure 1.**

25 **Supplementary Figure 2.**

26 **Supplementary Figure 3.**

27 **Supplementary Figure 4.**

28 **Supplementary Figure 5.**

29 **Supplementary Figure 6.**

30

31 **SUPPLEMENTARY TABLES:**

32 **Supplementary Table 1.**

33 **Supplementary Table 2.**

34

35

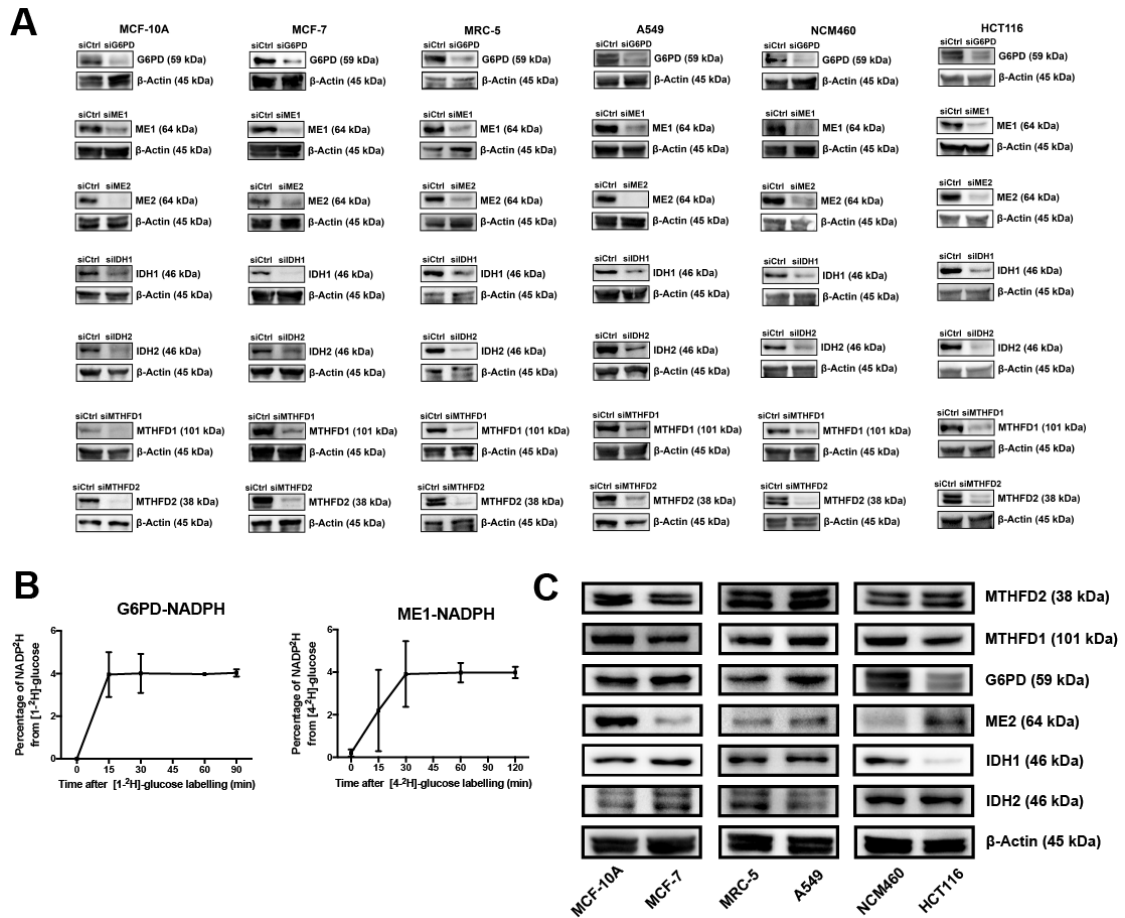

36

37 **Supplementary Figure 1. Cancerous but not normal cells rely on ME1-mediated**  
 38 **NADPH production. (Related to Figure 1)**

39 (A) Immunoblot analysis validates the knockdown efficiency of G6PD, ME1, ME2, IDH1,  
 40 IDH2, MTHFD1 and MTHFD2 with siRNAs in indicated cell lines. β-Actin was used as  
 41 loading control.

42 (B) Kinetics of percentage of NADPH labeling from [1-<sup>2</sup>H] glucose (10 mM) and [4-<sup>2</sup>H]  
 43 glucose (10 mM) (n=4).

44 (C) Immunoblot analysis of G6PD, ME2, IDH1, IDH2, MTHFD1 and MTHFD2 expression  
 45 in indicated cell lines. The samples used here were the same as those of Figure 1G. β-Actin  
 46 was used as the loading control.

47 Results are shown as mean ± SD. Experiments in A and B were conducted once, and C were  
 48 repeated at least twice.

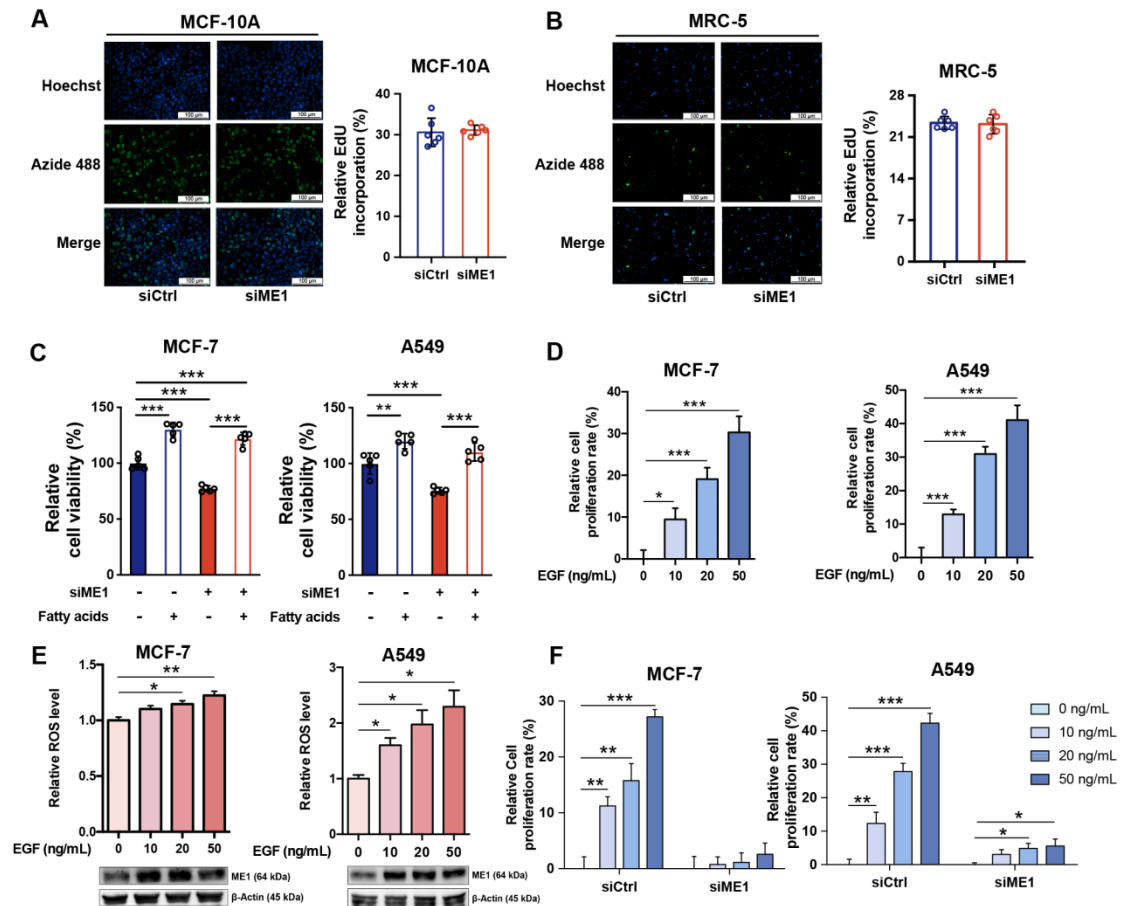

**Supplementary Figure 2. ME1 is pivotal for supporting cancer cell growth. (Related to Figure 2)**

(A) EdU incorporation assay of MCF-10A cells with control or ME1 knockdown (n=6). Scale bar, 100 μm.

(B) EdU incorporation assay of MRC-5 cells with control or ME1 knockdown (n=6). Scale bar, 100 μm.

(C) Relative cell viability of MCF-7 and A549 cells with or without ME1 knockdown supplemented with palmitic acid (10 μM) and oleic acid (10 μM) for 24 h (n=5).

(D) Proliferation rate of MCF-7 and A549 cells after being treated with different concentrations of EGF for 24 h (n=10).

(E) Intracellular ROS level and ME1 protein level in MCF-7 and A549 cells after being treated with different concentrations of EGF for 24 h (n=3).

(F) Proliferation rate of MCF-7 and A549 cells with or without ME1 knockdown after being treated with different concentrations of EGF for 24 h (n=6).

Results are shown as mean ± SD. Experiments in A, B and F were conducted once, and all the other experiments were repeated at least twice. Statistical significance was determined by Student's t-test, \* p<0.05, \*\*p<0.01, \*\*\*p<0.001.

49  
50  
51  
52  
53  
54  
55  
56  
57  
58  
59  
60  
61  
62  
63  
64  
65  
66  
67  
68  
69  
70

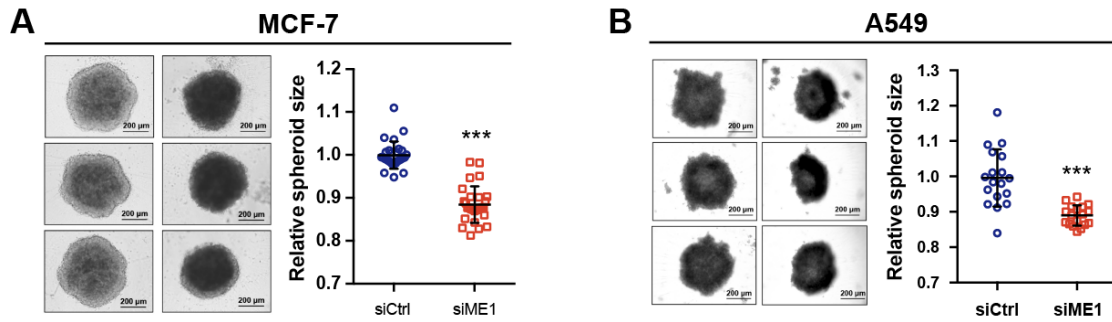

71

72

73 **Supplementary Figure 3. ME1 regulates cancer cell migration and**  
 74 **anchorage-independent survival. (Related to Figure 3)**

75 (A) Spheroid diameter of MCF-7 (n=28) and (B) A549 (n=17) cells with control and ME1  
 76 knockdown. Scale bar, 200  $\mu$ m.

77 Results are shown as mean  $\pm$  SD. Data represents at least two independent experiments.

78 Statistical significance was determined by Student's t-test, \*\*\*p<0.001.

79

80

81

82

83

84

85

86

87

88

89

90

91

92

93

94

95

96

97

98

99

100

101

102

103

104

105

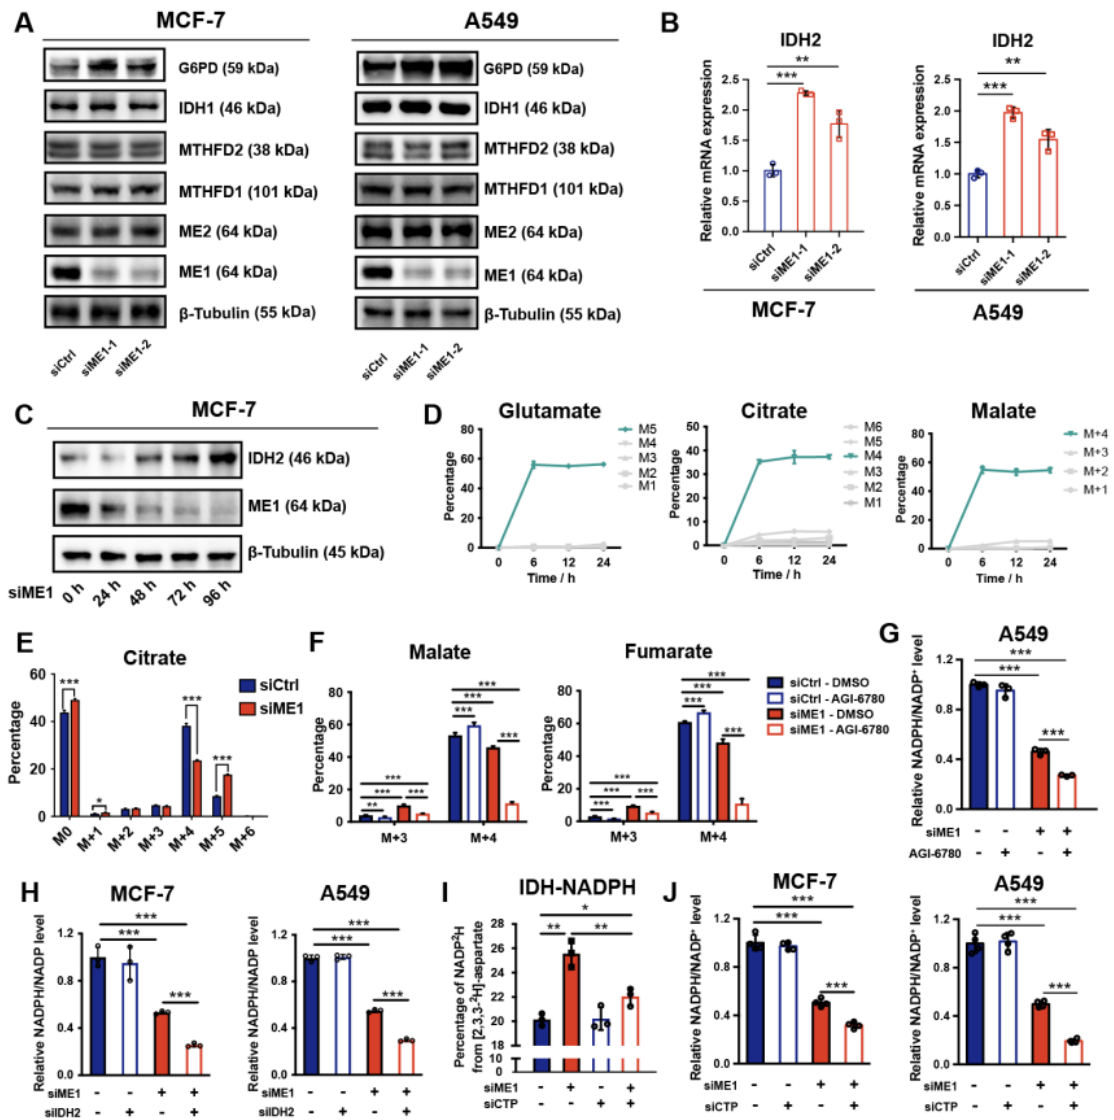

106

107 **Supplementary Figure 4. ME1 interference adaptively activates IDH2-mediated**  
 108 **NADPH compensation. (Related to Figure 4)**

109 (A) Immunoblot analysis of G6PD, IDH1, MTHFD1, MTHFD2, ME1 and ME2 expression in  
 110 MCF-7 and A549 cells with control or ME1 knockdown. The samples used here were the  
 111 same as those of Figure 4C. β-Tubulin was used as the loading control.

112 (B) mRNA level of IDH2 in MCF-7 and A549 cells with control or ME1 knockdown (n=3).  
 113 β-Actin was used for normalization.

114 (C) Immunoblot analysis of IDH2 in MCF-7 cells with ME1 knockdown cultured for  
 115 indicated time. β-Tubulin was used as the loading control.

116 (D) Kinetics of glutamate, citrate and malate labeling with 2 mM [U-<sup>13</sup>C] glutamine in  
 117 MCF-7 cells (n=3).

118 (E) Mass isotopologue analysis of citrate in A549 cells cultured with 2 mM [U-<sup>13</sup>C] glutamine  
 119 for 24 h (n=5).

120 (F) m+3 and m+4 isotopologues of malate and fumarate in MCF-7 cells treated as indicated  
 121 and cultured in medium containing 2 mM [U-<sup>13</sup>C] glutamine for 24 h (n=3 for the

122 siME1-DMSO group and n=5 for others). The concentration of AGI-6780 used in this study is  
123 2.5  $\mu$ M.

124 (G) Effect of combinatorial targeting ME1 and IDH2 (2.5  $\mu$ M AGI-6780 for 24 h) on relative  
125 NADPH/NADP<sup>+</sup> ratio in A549 cells (n=3).

126 (H) Effect of combinatorial targeting ME1 and IDH2 via siRNAs on relative NADPH/NADP<sup>+</sup>  
127 ratio in MCF-7 and A549 cells (n=3).

128 (I) Percentage of NADP<sup>2</sup>H labeling from 2 mM [2,3,3-<sup>2</sup>H] aspartate for 24 h in MCF-7 cells  
129 with control transfection or ME1, CTP knockdown or both (n=3).

130 (J) Effect of combinatorial targeting ME1 and CTP on relative NADPH/NADP<sup>+</sup> ratio in  
131 MCF-7 and A549 cells (n=4).

132 Results are shown as mean  $\pm$  SD. Experiments in D, E and I were conducted once and all  
133 the other experiments were repeated at least twice. Statistical significance was determined by  
134 Student's t-test, \* p<0.05, \*\*p<0.01, \*\*\*p<0.001.

135

136

137

138

139

140

141

142

143

144

145

146

147

148

149

150

151

152

153

154

155

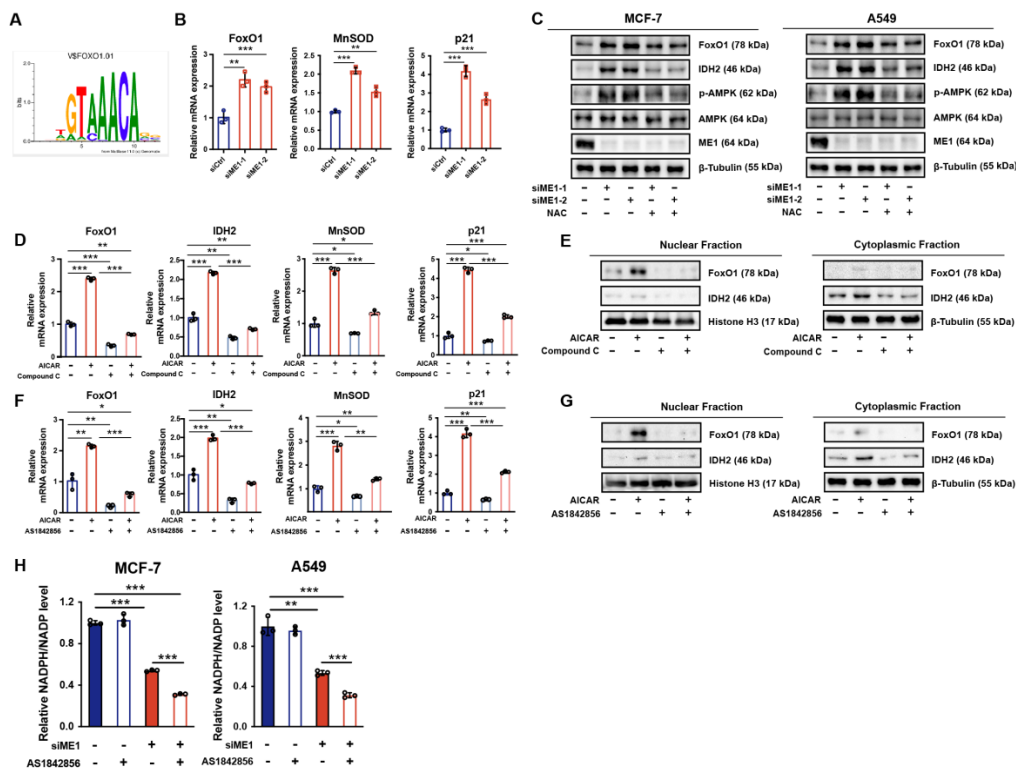

156

157 **Supplementary Figure 5. AMPK-FoxO1 axis underlies adaptive IDH2 upregulation.**  
 158 **(Related to Figure 5)**

159 (A) FoxO1 DNA-binding sites are present in the human IDH2 promoter region.

160 (B) mRNA level of FoxO1, MnSOD and p21 in MCF-7 cells with control and ME1  
 161 knockdown (n=3).  $\beta$ -Actin was used for normalization.

162 (C) Immunoblot analysis of FoxO1, p-AMPK and AMPK expression in MCF-7 and A549  
 163 cells with control or ME1 knockdown and treated with or without NAC (10 mM) for 24 h.  
 164  $\beta$ -Tubulin was used as the loading control.

165 (D) mRNA levels of FoxO1, IDH2, MnSOD and p21 in MCF-7 cells treated with AICAR (1  
 166 mM), Compound C (5  $\mu$ M) or both for 24 h (n=3).  $\beta$ -Actin was used for normalization.

167 (E) Immunoblotting analysis of nuclear and cytosolic FoxO1 and IDH2 expression in MCF-7  
 168 cells treated with AICAR (1 mM), Compound C (5  $\mu$ M) or both for 24 h. Histone H3 was  
 169 used as nuclear loading control and  $\beta$ -Tubulin was used as cytosolic loading control.

170 (F) mRNA levels of FoxO1, IDH2, MnSOD and p21 in MCF-7 cells treated with AICAR (1  
 171 mM), AS1842656 (0.2  $\mu$ M) or both for 24 h (n=3).  $\beta$ -Actin was used for normalization.

172 (G) Immunoblotting analysis of nuclear and cytosolic FoxO1 and IDH2 expression in MCF-7  
 173 cells treated with AICAR (1 mM), AS1842656 (0.2  $\mu$ M) or both for 24 h. Histone H3 was  
 174 used as nuclear loading control and  $\beta$ -Tubulin was used as cytosolic loading control.

175 (H) Effect of combinatorial targeting ME1 and FoxO1 on NADPH/NADP<sup>+</sup> ratio in MCF-7  
 176 and A549 cells (n=3).

177 Results are shown as mean  $\pm$  SD. Data represents at least two independent experiments  
 178 except experiments in H were conducted once. Statistical significance was determined by  
 179 Student's t-test, \* p<0.05, \*\*p<0.01, \*\*\*p<0.001.



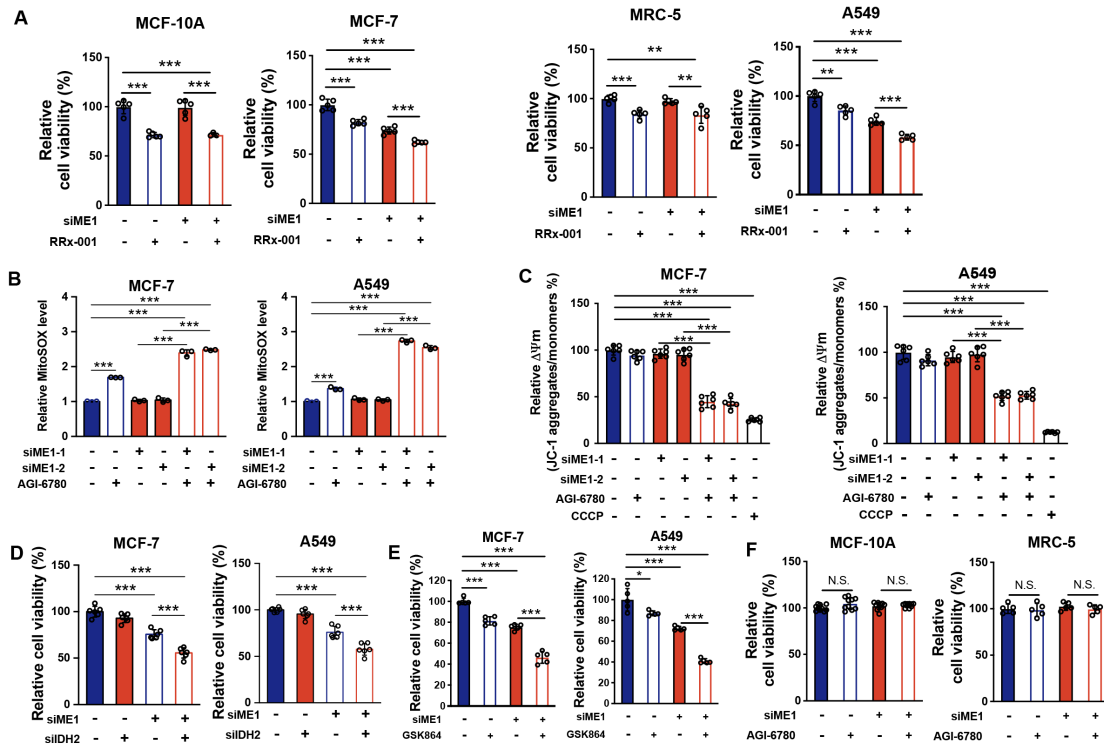

180

181 **Supplementary Figure 6. ME1 and IDH2 synergistically induce cancer cell apoptosis.**  
 182 **(Related to Figure 6)**

183 (A) Effect of combinatorial targeting ME1 and G6PD (5  $\mu$ M RRx-001 for 24 h) on relative  
 184 cell viability in MCF-10A, MCF-7, MRC-5 and A549 cells (n=5).

185 (B) Effect of combinatorial targeting ME1 and IDH2 (2.5  $\mu$ M AGI-6780 for 24 h) on  
 186 mitochondrial ROS level in MCF-7 and A549 cells (n=3).

187 (C) Effect of combinatorial targeting ME1 and IDH2 (2.5  $\mu$ M AGI-6780 for 24 h) on  
 188 mitochondrial outer membrane permeabilization (MOMP) in MCF-7 and A549 cells (n=6).  
 189 Cells treated with carbonyl cyanide 3-chlorophenylhydrazone (CCCP) (10  $\mu$ M for 20 min)  
 190 were used as a positive control.

191 (D) Viability of cells with control transfection, ME1, IDH2 knockdown and both in MCF-7  
 192 and A549 cells (n=6).

193 (E) Effect of combinatorial targeting ME1 and IDH1 (8  $\mu$ M GSK864 for 24 h) on relative cell  
 194 viability in MCF-7 and A549 cells (n=5).

195 (F) Effect of combinatorial targeting ME1 and IDH2 (2.5  $\mu$ M AGI-6780 for 24 h) on relative  
 196 cell viability of MCF-10A (n=10) and MRC-5 cells (n=5).

197 Results are shown as mean  $\pm$  SD. Data represents at least two independent experiments.  
 198 Statistical significance was determined by Student's t-test. \* p<0.05, \*\*p<0.01, \*\*\*p<0.001,  
 199 N.S., non-significant.

200

201

202

203

204 **Supplementary Table 1. Clinical characters of the 12 breast cancer patients included in**  
 205 **this study.**

206

| Patient ID | age | grade | ER    | PR    | HER2 | Pathological type | Metastasis            |
|------------|-----|-------|-------|-------|------|-------------------|-----------------------|
| 1          | 70  | 2-3   | 90.0% | 5%    | -    | Type B            | Lymph node metastasis |
| 2          | 44  | 3     | 80.0% | 20.0% | +    | Type B            | -                     |
| 3          | 41  | 2     | 90.0% | 90.0% | -    | Type B            | -                     |
| 4          | 77  | 2     | 90.0% | -     | -    | Type B            | Lymph node metastasis |
| 5          | 75  | 2     | 90.0% | 90.0% | -    | Type B            | -                     |
| 6          | 58  | 2     | -     | -     | -    | Triple negative   | -                     |
| 7          | 60  | 2-3   | 10.0% | -     | +    | Type B            | -                     |
| 8          | 76  | 2     | 90.0% | 30.0% | -    | Type B            | +                     |
| 9          | 49  | 2     | 80.0% | 60.0% | -    | Type B            | +                     |
| 10         | 74  | 2     | 90.0% | 50.0% | -    | Type B            | -                     |
| 11         | 62  | 3     | -     | -     | -    | Triple negative   | -                     |
| 12         | 49  | 2     | 90.0% | 90.0% | -    | Type A            | +                     |

207

208

209

210

211

212

213

214

215

216

217

218

219

220

221

222

223

224

225

226

227

228

229

230

231 **Supplementary Table 2. Sequences of qPCR Primers used in this study.**

232

|                               |                               |
|-------------------------------|-------------------------------|
| ME1 forward primer            | 5'-ACAGATAATATTTTCCTCACT-3'   |
| ME1 reverse primer            | 5'-CTACTGGTCAACTTTGGT-3'      |
| IDH2 forward primer           | 5'-TACGGGTCATCTCATCACCA-3'    |
| IDH2 reverse primer           | 5'-ACCTCGCAAGAGCAGCC-3'       |
| FoxO1 forward primer          | 5'-GGATGTGCATTCTATGGTGTACC-3' |
| FoxO1 reverse primer          | 5'-TTTCGGGATTGCTTATCTCAGAC-3' |
| MnSOD forward primer          | 5'-TTTCAATAAGGAACGGGGACAC -3' |
| MnSOD reverse primer          | 5'- GTGCTCCCACACATCAATCC-3'   |
| p21 forward primer            | 5'-GTGGACCTGGAGACTCTC-3'      |
| p21 reverse primer            | 5'-TTCCTCTTGGAGAAGATCAG -3'   |
| $\beta$ -actin forward primer | 5'-GCGTGACATTAAGGAGAAG-3'     |
| $\beta$ -actin reverse primer | 5'-GAAGGAAGGCTGGAAGAG-3'      |

233
